# Supplementary material
Source: publisher figshare collection journal article supplement (https://acs.figshare.com/ndownloader/files/5055943)
Supplement: Supplementary file 1 [file 5055943]

## A High Resolution Solid State NMR Approach for Structural Studies of Bicelles

Sergey Dvinskikh, Ulrich Dürr, Kazutoshi Yamamoto and Ayyalusamy Ramamoorthy\*

### A. Pulse sequence

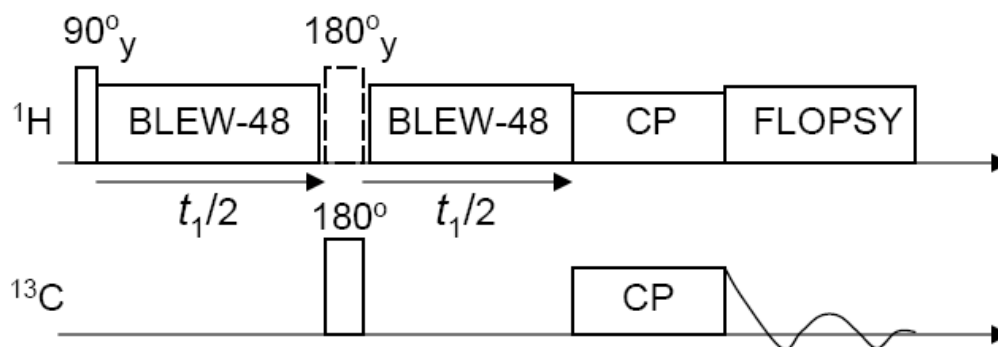

2D pulse sequence employed in the measurement of  $^{13}\text{C}$ - $^1\text{H}$ ,  $^{13}\text{C}$ - $^{31}\text{P}$  and  $^1\text{H}$ - $^{31}\text{P}$  dipolar couplings. In the  $t_1$  period, proton magnetization evolves in the presence of homonuclear proton decoupling sequence BLEW48. After the cross polarization from proton to carbon, the  $^{13}\text{C}$  signal is recorded in the presence of proton decoupling by the FLOPSY sequence. In the PDLF experiment with the two simultaneous  $180^\circ$  pulses, in the middle of the evolution period ( $t_1$ ),  $^1\text{H}$ - $^{31}\text{P}$ ,  $^{13}\text{C}$ - $^{31}\text{P}$  couplings and  $^1\text{H}$  chemical shift are suppressed while the  $^{13}\text{C}$ - $^1\text{H}$  dipolar splittings are obtained in the indirect dimension. On the other hand, in the absence of the proton  $180^\circ$  pulse, the  $^{13}\text{C}$ - $^1\text{H}$  interactions are refocused while the  $^1\text{H}$ - $^{31}\text{P}$  dipolar coupling and  $^1\text{H}$  chemical shift are present in the indirect dimension. In both cases the dipolar spectra in the indirect dimension are correlated to the  $^{13}\text{C}$  chemical shift and  $^{13}\text{C}$ - $^{31}\text{P}$  dipolar couplings in the direct dimension.

## B. $^{31}\text{P}$ chemical shift spectra of bicelles

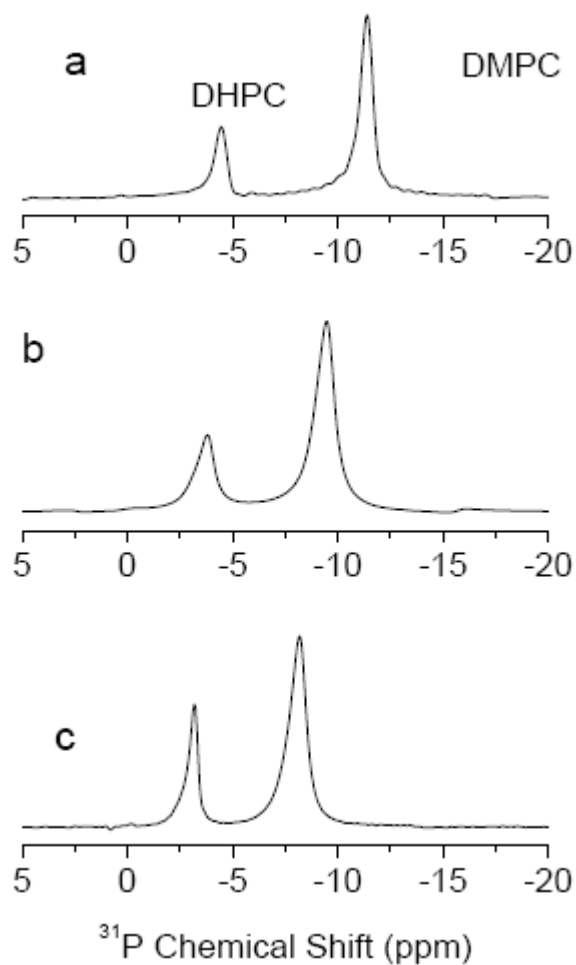

$^{31}\text{P}$  NMR spectra of bicelle samples with different concentrations of MSI-78 peptide: a) 0 mole %, b) 0.5 mole % and c) 2.0 mole % MSI-78. Spectra were obtained by acquiring the FID after a  $90^\circ$  rf pulse in the presence of 10 kHz proton decoupling. 64 transients were accumulated with a recycle delay of 3 s. The chemical shift scale was referenced by setting the isotropic peak observed at  $10^\circ\text{C}$  to 0 ppm.
